# Supplementary material
Source: Springer Nature journal article supplement (https://www.springermedizin.de/resource/supplementary/12872_2014_759_MOESM2_ESM.pdf/9430438)

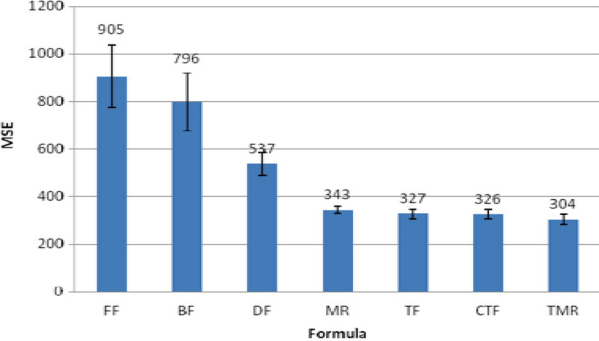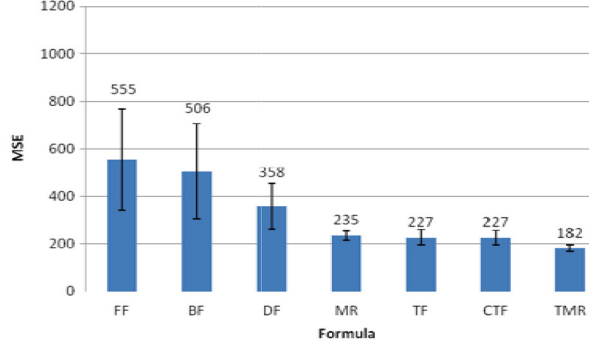

a

b

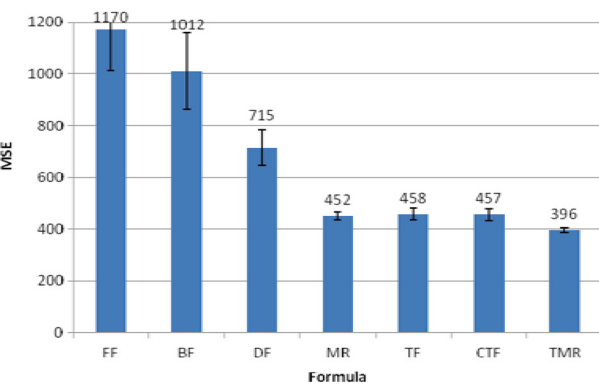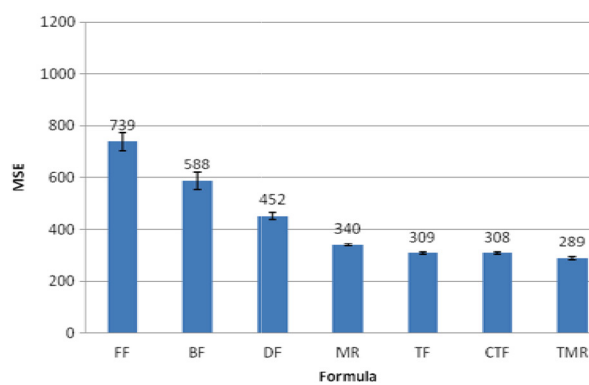

c

d

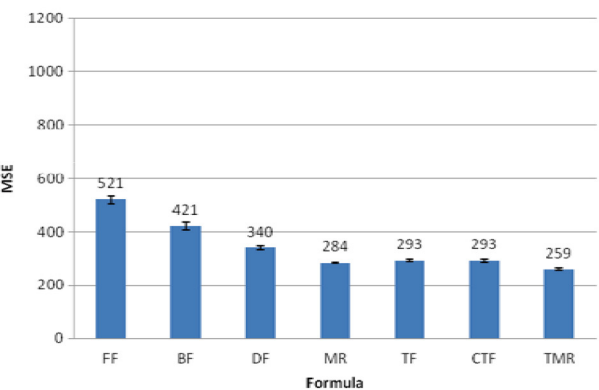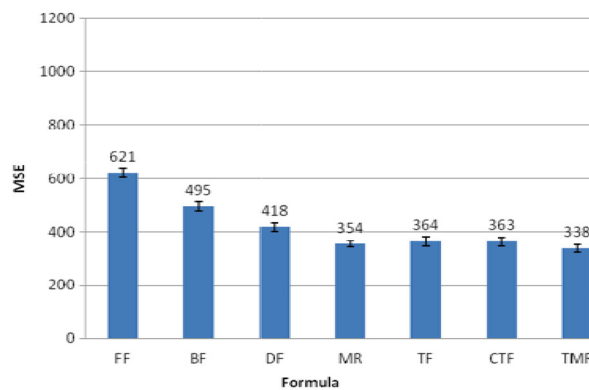

e

f

Supplement: MOESM2 [file 9430438]
